# Supplementary material for: Proton-sensitive fluorescent organogelsElectronic supplementary information (ESI) available: excitation spectrum of 1·H+ and fluorescence spectrum of 1 in 1-propanol at 25 °C. See http://www.rsc.org/suppdata/ob/b2/b210968a/
Source: Royal Society of Chemistry journal article supplement (doi:10.1039/b210968a), 2003-02-11
Supplement: b210968a.pdf [file b210968a.pdf]

---

## Proton-sensitive fluorescent organogels

---

Kazunori Sugiyasu,<sup>a</sup> Norifumi Fujita,<sup>a</sup> Masayuki Takeuchi,<sup>a</sup> Sunao Yamada,<sup>b</sup> and Seiji Shinkai\*<sup>a</sup>

<sup>a</sup> Department of Chemistry and Biochemistry, Graduate School of Engineering, Kyushu University, 6-10-1 Hakozaiki, Higashi-ku, Fukuoka, 812-8581, Japan. E-mail: [seijitcm@mbox.nc.kyushu-u.ac.jp](mailto:seijitcm@mbox.nc.kyushu-u.ac.jp); Fax: +81 92 642 3611

<sup>b</sup> Department of Materials Physics and Chemistry, Graduate School of Engineering, Kyushu University, 6-10-1 Hakozaiki, Higashi-ku, Fukuoka, 812-8581, Japan.

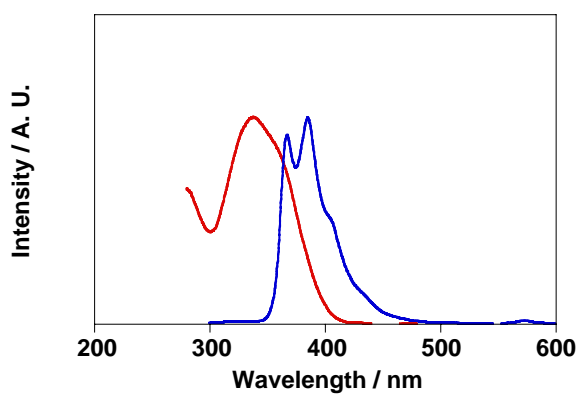

**Supplementary Fig. 1** Excitation spectrum (red) of  $1\cdot\text{H}^+$  and fluorescence spectrum (blue) of **1** in 1-propanol at 25 °C:  $[\mathbf{1}] = 1.6 \times 10^{-5} \text{ mol dm}^{-3}$ ,  $[\text{TFA (when added)}] = 15 \text{ mmol dm}^{-3}$ , excitation wavelength 285 nm, fluorescence wavelength 493 nm.
